# Supplementary material for: Development of Novel Nano-Sized Imine Complexes Using Coriandrum sativum Extract: Structural Elucidation, Non-Isothermal Kinetic Study, Theoretical Investigation and Pharmaceutical Applications
Source: MDPI journal article supplement (doi:10.3390/ijms241814259), 2023-09-19
Supplement: s1 [file s1]

# Development of novel nano sized imine complexes using *Coriandrum sativum* extract: Structural elucidation, non-isothermal kinetic study, theoretical investigation and pharmaceutical applications

Shimaa Hosny <sup>1,\*</sup>, Randa F. Abd El-Baki <sup>1</sup>, Zeinab H. Abd El-Wahab <sup>2</sup> and Gamal A. Gouda <sup>3</sup>, Mohammed S. Saddik<sup>4</sup>, Ateyatallah Aljuhani<sup>5</sup>, Ahmed M. Abu-Dief<sup>5,6,\*</sup>

<sup>1</sup> Department of Chemistry, Faculty of Science, New Valley University, Alkharga 72511, Egypt; shimaahosny@sci.nvu.edu.eg; randafouad\_1974@sci.nvu.edu.eg

<sup>2</sup> Department of Chemistry, Faculty of Science (Girl's), Al-Azhar University, Cairo, 11754, Egypt; zhabdelwahab@azhar.edu.eg

<sup>3</sup> Department of Chemistry, Faculty of Science, Al-Azhar University, Assiut Branch, 71524, Assiut, Egypt; ggouda73@azhar.edu.eg

<sup>4</sup>Department of Pharmaceutics and Clinical Pharmacy, Faculty of Pharmacy, Sohag University, P.O. Box 82524, Sohag 82524, Egypt, mohammed.sherif@pharm.sohag.edu.eg

<sup>5</sup> Chemistry Department, College of Science, Taibah University, Madinah 42353, Saudi Arabia amamohammed@taibahu.edu.sa (Ahmed M. Abu-Dief); assjuhani@taibahu.edu.sa (Ateyatallah Aljuhani)

<sup>6</sup> Chemistry Department, Faculty of Science, Sohag University, Sohag 82524, Egypt

\* Correspondence: shimaahosny@sci.nvu.edu.eg (Shimaa Hosny) and amamohammed@taibahu.edu.sa (Ahmed M. Abu-Dief)

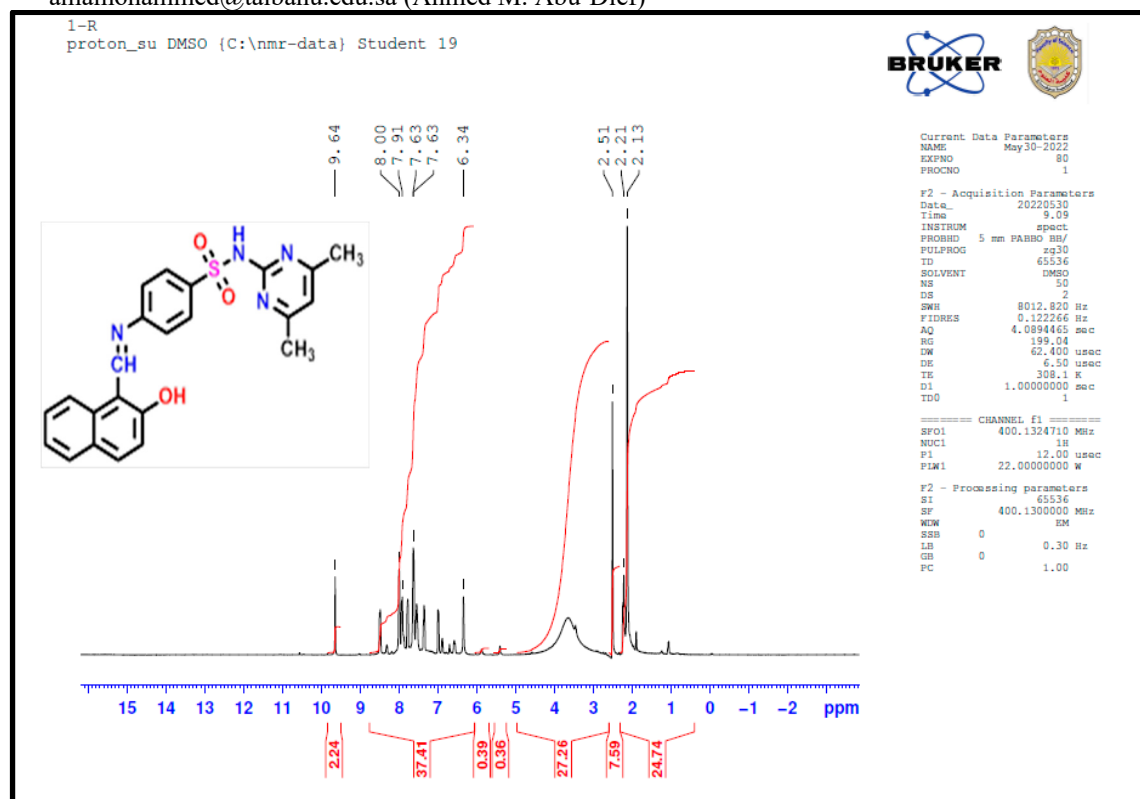

Figure S1. <sup>1</sup>H NMR spectrum of H<sub>2</sub>L in DMSO

**Table S1** Essential vibrational frequencies ( $\text{cm}^{-1}$ ) of  $\text{H}_2\text{L}$  and its micro-complexes

| IR bands ( $\text{cm}^{-1}$ ) |                                              |                          |                                              |                                |                                |                              |                          |                          |
|-------------------------------|----------------------------------------------|--------------------------|----------------------------------------------|--------------------------------|--------------------------------|------------------------------|--------------------------|--------------------------|
| No                            | Compound                                     | $\nu(\text{C}=\text{N})$ | $\nu(\text{O}-\text{H})$ ); $\nu(\text{NH})$ | $\nu_{\text{as}}(\text{SO}_2)$ | $\nu_{\text{sy}}(\text{SO}_2)$ | $\delta(\text{H}_2\text{O})$ | $\nu(\text{M}-\text{O})$ | $\nu(\text{M}-\text{N})$ |
| I                             | $\text{H}_2\text{L}$                         | 1633                     | 3200;3457                                    | 1384                           | 1156                           | -----                        | -----                    | -----                    |
| II                            | $[\text{NiL}_2] \cdot 1.5\text{H}_2\text{O}$ | 1602                     | ;3453                                        | 1384                           | 1152                           | 970                          | 585                      | 549                      |
| III                           | $\text{CdL}_2$                               | 1624                     | ;3458                                        | 1384                           | 1157                           | -----                        | 566                      | 544                      |

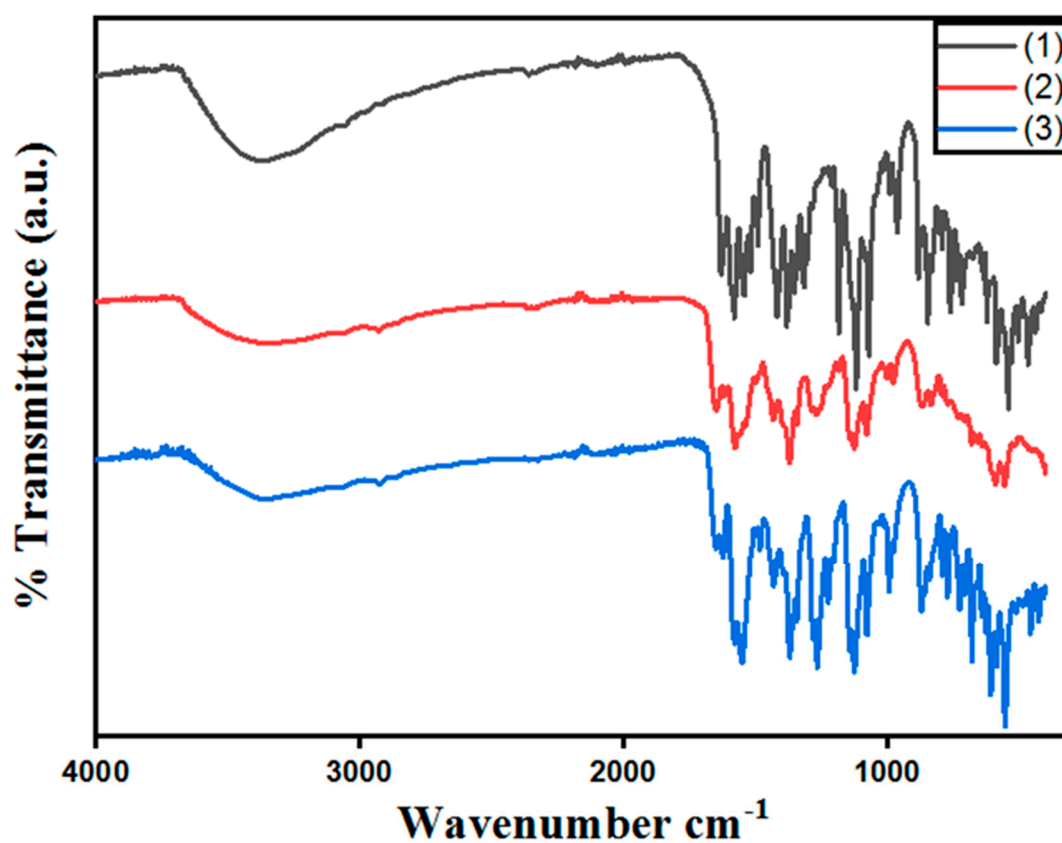**Figure S2.** FT-IR spectra of  $\text{H}_2\text{L}$ (1), Ni (II) complex(2) and Cd(II) complex(3)

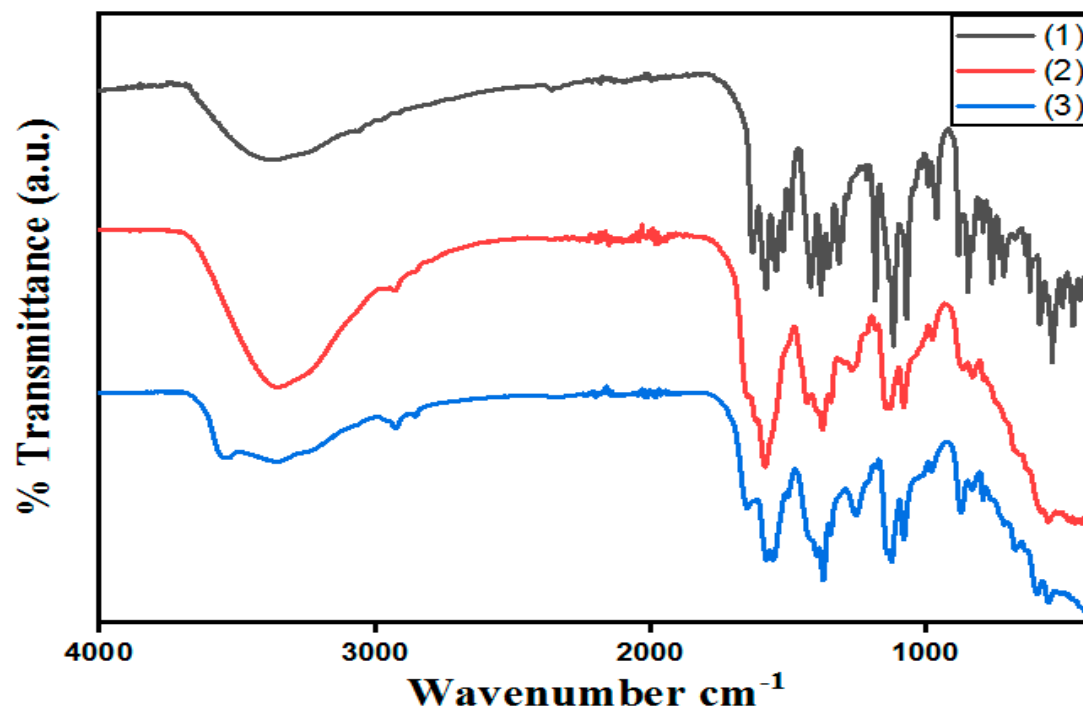

**Figure S3.** FT-IR spectra of  $\text{H}_2\text{L}$ (1), Ni nano complex (2) and Cd nano complex(3)

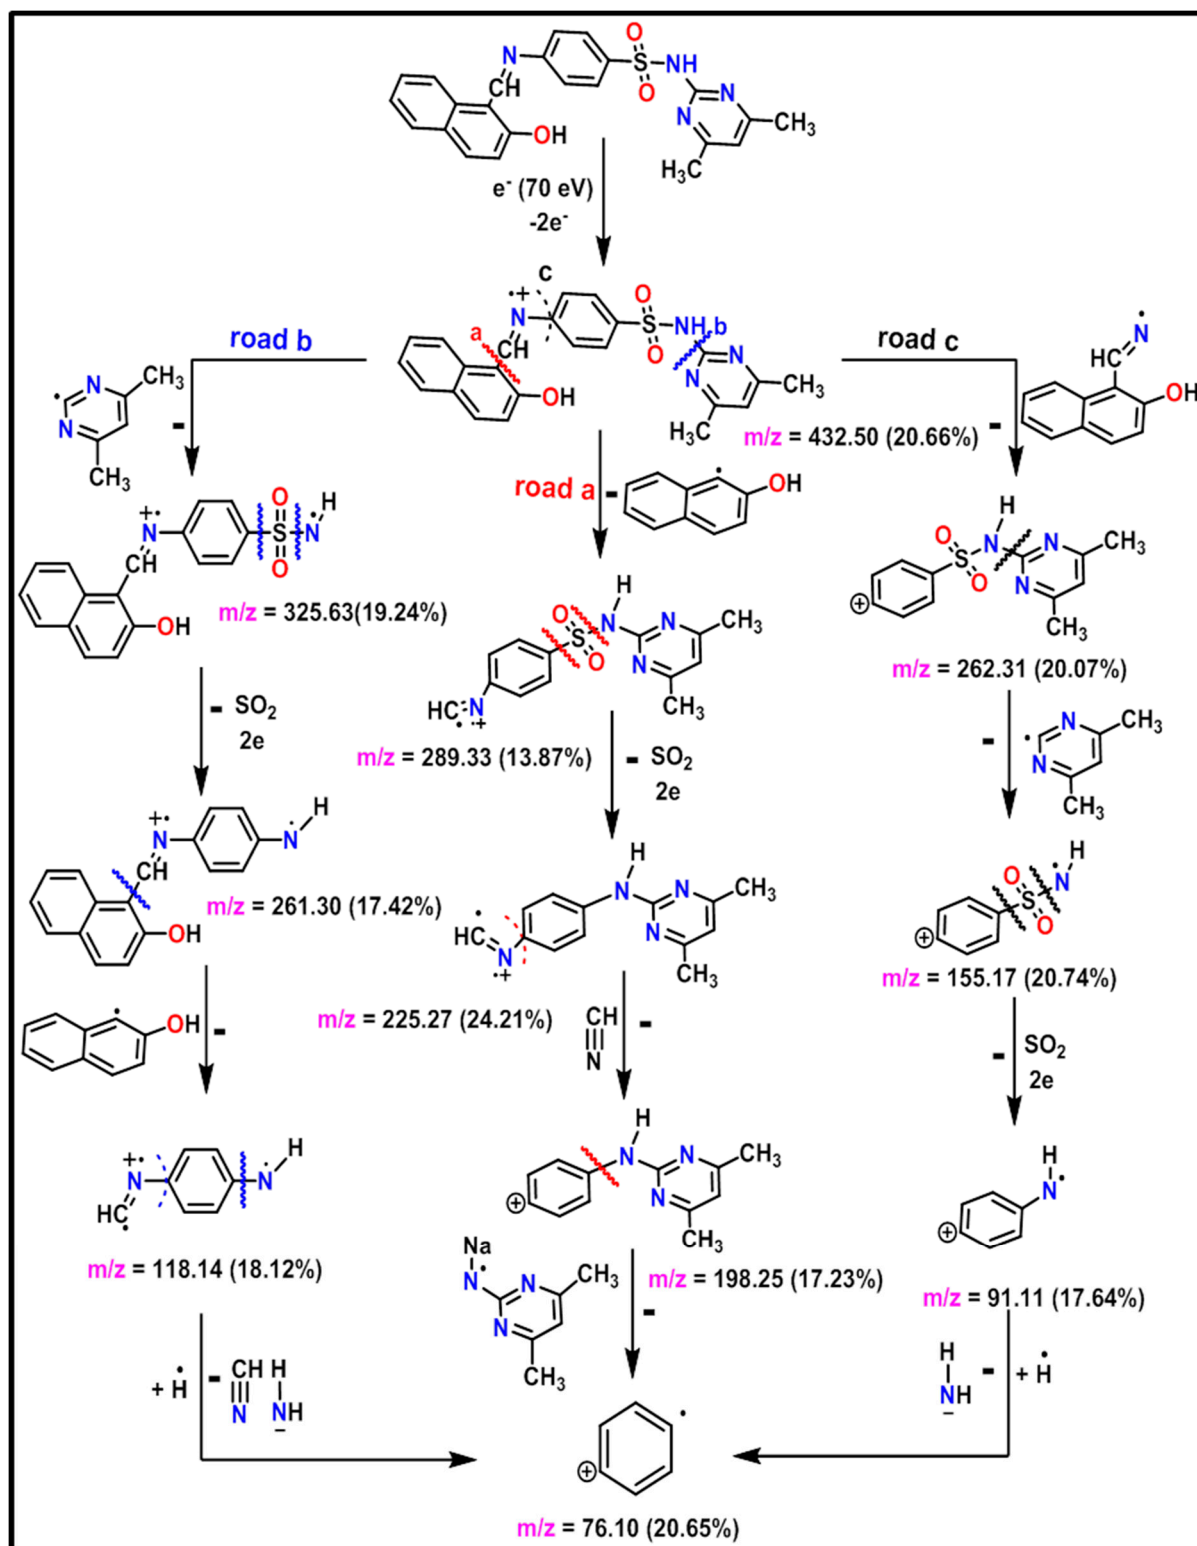

**Scheme S1** Suggested MS fragmentation pattern of Schiff base ligand

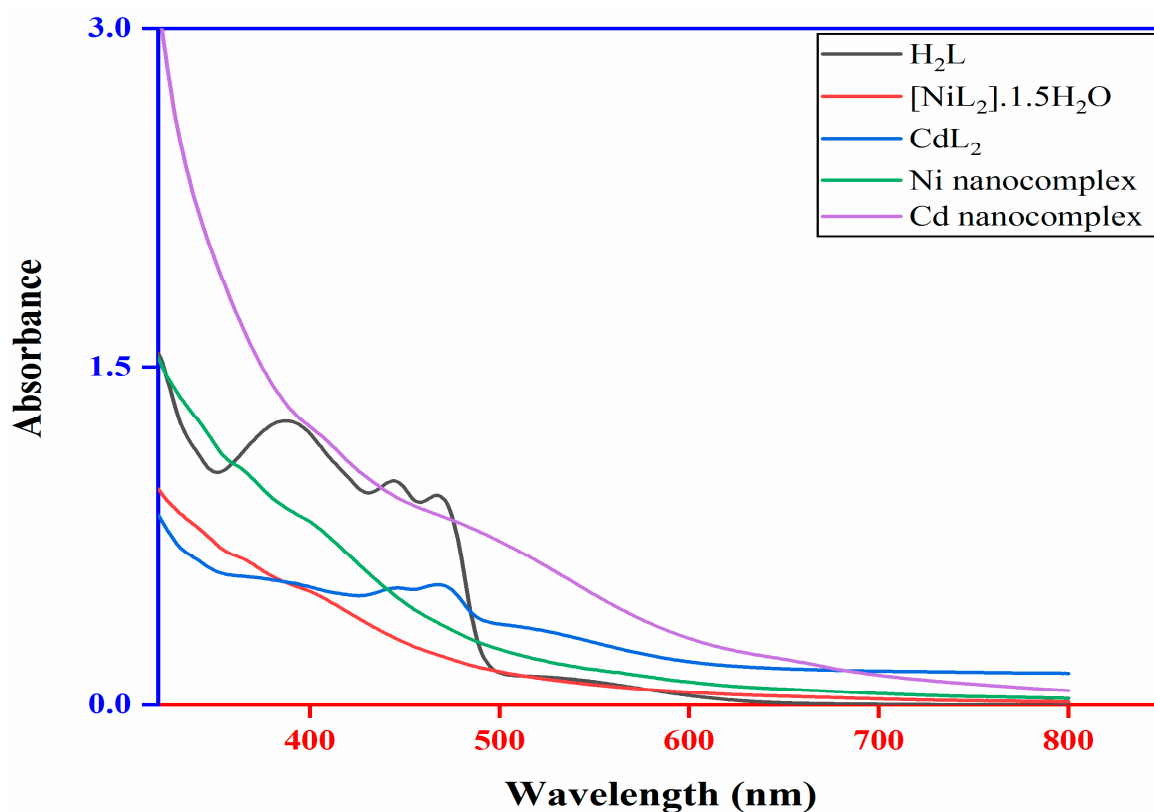

**Figure S4.** UV-Vis absorption spectra in  $10^{-4}$  DMF solution

#### **Section S1: Materials and equipment's**

All chemicals used were obtained from Aldrich or BDH. They included 2-Hydroxy-1-naphthaldehyde, sulfamethazine,  $\text{NiCl}_2 \cdot 6\text{H}_2\text{O}$  or  $\text{CdCl}_2 \cdot 2.5\text{H}_2\text{O}$  and  $\text{LiOH}$ . The solvents, such as absolute ethyl alcohol and Dimethylformamide (DMF) were used as received without pretreatment.

The characterization of ligand  $\text{H}_2\text{L}$  and their corresponding micro/nano  $\text{Ni(II)}$ , and  $\text{Cd(II)}$  complexes was carried out utilizing the various spectroscopic techniques: Elemental analyses (C, H, Cl, and N) were performed by Micro analytical unit of the Cairo University, Egypt.  $^1\text{H}$  NMR spectra in deuterated dimethyl sulfoxide  $d_6\text{-DMSO}$  were recorded using a 300 MHz Varian NMR spectrometer. The chemical shift was measured relative to the solvent peak. Mass spectrum for ligand and metal complexes was run on Shimadzu-QP 2010 plus Mass Spectrometer, Microanalytical Laboratory, Faculty of Science, Cairo University, Egypt. The Fourier transform infrared absorption spectra of solid ligand and micro/nano complexes was performed by Micro analytical unit at Cairo University, Egypt, in the wavelength range ( $4000\text{-}400\text{ cm}^{-1}$ ) using KBr discs using a Nenexeus-Nicolidite -640-MSA FT-IR infrared

spectrophotometer. The electronic spectra (ultraviolet/visible) were recorded using a Perkin Elmer Lambda 330 spectrophotometer. The electronic spectra of Dimethyl Formamide (DMF) solution of both the ligand and micro/nano complexes were recorded in 1cm quartz cells. The molar conductivity measurements were determined in N, N' Dimethyl- formamide (DMF) solution at ( $10^{-3}\text{M}$ ) using a tacussel conductimeter type CD6N.

Thermal Analyzer with a heating rate of  $10\text{ }^{\circ}\text{C}/\text{min}$  in a nitrogen atmosphere with a following rate of  $20\text{ mL}/\text{min}$  in the ambient temperature range up to  $800\text{ }^{\circ}\text{C}$  using platinum crucibles. X-ray powder diffraction analyses of solid samples were measured using APD 2000 PROModel GNR-X-ray Diffractometer at (Central lab., Tanta University, Egypt). X-ray diffractograms give computer control formally finished by PHILIPS®MPDX'PERT X-ray diffractometer ready with Cu radiation  $\text{CuK}\alpha$  ( $\lambda=1.540\text{ }56\text{ \AA}$ ). The x'pertdiffractometer has the Bragg-Brentano geometry. The x-ray tube was a copper tube operating at  $40\text{ KV}$  and  $30\text{ mA}$ . The scanning range ( $2\theta$ ) was  $5\text{--}90^{\circ}$  with a step size of  $0.050^{\circ}$  and a counting time of  $2\text{ s}/\text{step}$ . Quartz was used as the standard material to accurate for the instrumental expansion. This identification of the nano complexes was done by a known method. From the fit identified Scherrer formula, the average crystallite size ( $D$ ) is  $D = (K\lambda / \beta \cos \theta)$  Where:  $\lambda$  is the X- ray wavelength in the nanometer,  $K$  is a factor related to crystallite shape, with a value of about  $0.9$  and  $\beta$  is the peak width at half maximum height. The value of  $\beta$  in the  $2\theta$  axis of diffraction shape must be in radians. The  $\theta$  is the Bragg angle and can be in radians since the  $\cos \theta$  compatible with the same number. The surface morphological and particle size study was recorded by TEM micrographs were executed using JEOL JEM-1200 EX II, Japan at  $60\text{--}70\text{ kV}$ .
